# Supplementary material for: Setting Physical Activity Goals with a Virtual Coach: Vicarious Experiences, Personalization and Acceptance
Source: Springer Nature journal article supplement (doi:10.1007/s10916-022-01899-9), 2023-01-30
Supplement: MOESM1 [file 23968284]

Albers, N.\*, Hizli, B., Scheltinga, B.L., Meijer, E., and Brinkman, W.P. (2023). Setting physical activity goals with a virtual coach: Vicarious experiences, personalization and acceptance. *Journal of Medical Systems*.

\*Intelligent Systems, Delft University of Technology, Delft, The Netherlands

E-mail: [n.albers@tudelft.nl](mailto:n.albers@tudelft.nl)

## Running Self-Efficacy Questionnaire

Using the scales listed below please indicate how **confident** you are that you will be able to **run at a moderate intensity** for the given amount of minutes **per week**. When you're running at a moderate intensity, you breathe heavily but you can still hold a short conversation.

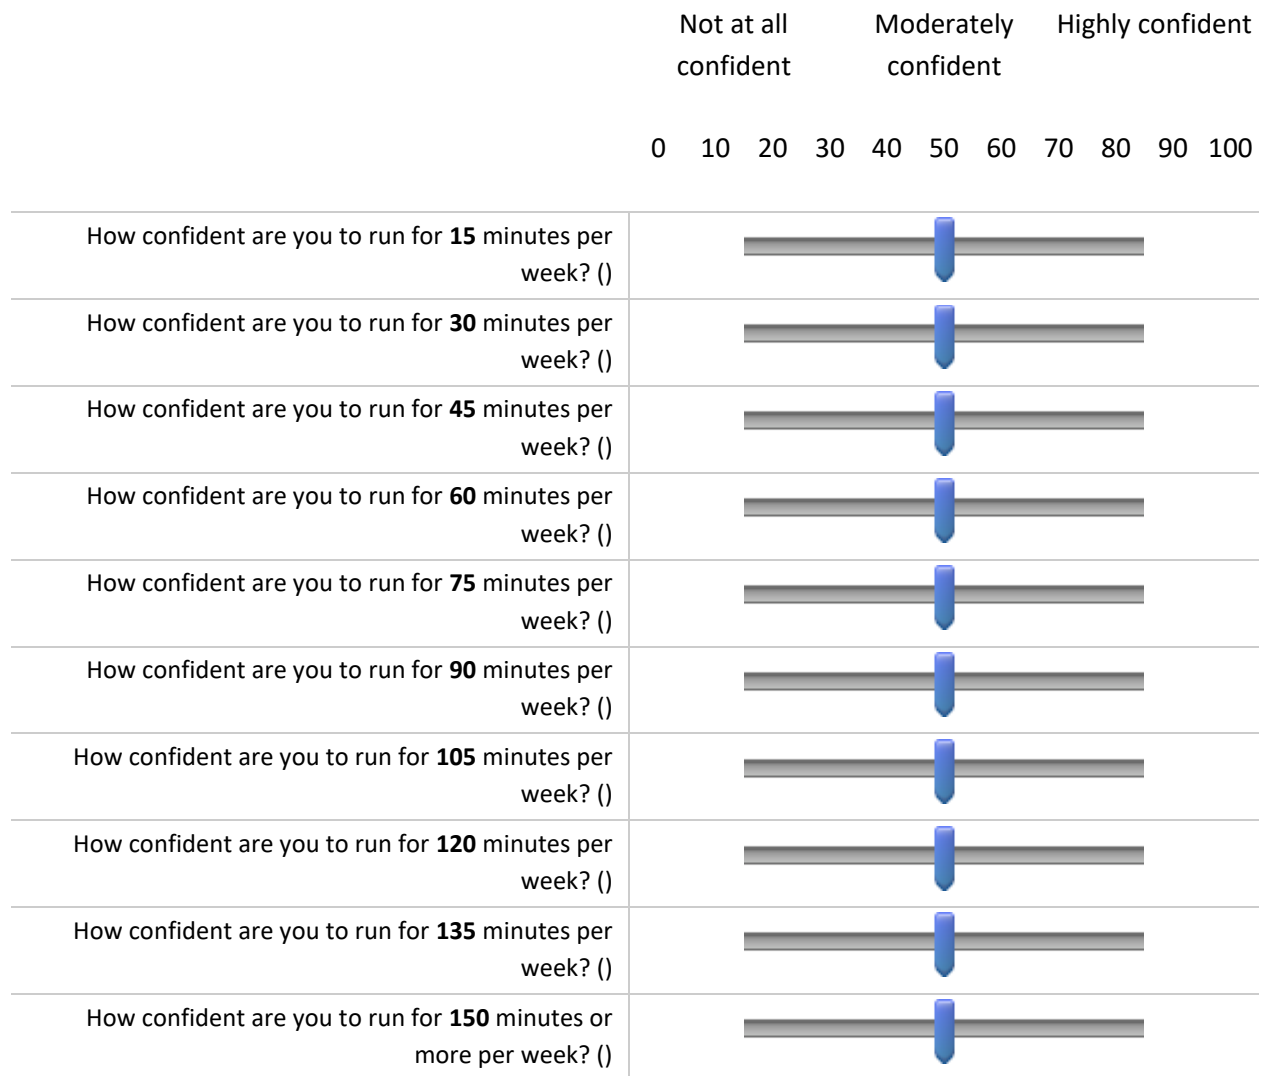

*The mean of all confidence ratings is used as an index measure.*
